# Supplementary material for: Bioactive poly(2-oxazoline)-based nanomaterials bearing arylalkylamine and benzamide motifs possess intrinsic radical trapping and anti-ferroptosis properties
Source: Royal Society of Chemistry journal article supplement (doi:10.1039/d2bm02087d), 2023-01-01
Supplement: d2bm02087d1.pdf [file d2bm02087d1.pdf]

## SUPPLEMENTARY INFORMATION

### **Bioactive poly(2-oxazoline)-based nanomaterials bearing arylalkylamine and benzamide motifs possess intrinsic radical trapping and anti-ferroptosis properties**

*Joshua P. Morrow,<sup>†</sup> David Pizzi,<sup>†</sup> Zihnil A. I. Mazrad,<sup>†</sup> Ashley I. Bush,<sup>±</sup> and Kristian Kempe<sup>‡\*</sup>*

<sup>†</sup> Drug Delivery, Disposition and Dynamics, Monash Institute of Pharmaceutical Sciences, Monash University, Parkville, VIC 3052, Australia

<sup>±</sup> Melbourne Dementia Research Centre, The Florey Institute for Neuroscience and Mental Health, The University of Melbourne, Parkville, Victoria 3052, Australia

<sup>‡</sup> Materials Science and Engineering, Monash University, Clayton, VIC 3800, Australia;

Corresponding author e-mail: [kristian.kempe@monash.edu](mailto:kristian.kempe@monash.edu)

Table of contents:

- I. Abbreviations
- II. Additional characterization by  $^1\text{H}$  NMR spectroscopy and SEC chromatography of M45F4R and associated polymers
- III. Additional characterization of the P(MeOx-grad-PhOx) library by  $^1\text{H}$  NMR spectroscopy, DLS, SEC chromatography and their cytocompatibility in N27 cells
- IV. Descriptions of polymer  $\text{EC}_{50}$  values
- V. Validation of compatible treatment conditions for flow cytometry
- VI. Additional characterization of CCMs by  $^1\text{H}$  NMR spectroscopy, DLS and SEC chromatography
- VII. Supplementary confocal and flow cytometry investigations for evaluating therapeutic nanomaterials

# Abbreviations

ROS reactive oxygen species  
GPX4 glutathione peroxidase 4  
DMT1 Divalent metal transporter 1  
ACSL3/4 acyl-CoA synthetase long chain family member 3 and 4  
ALOX Arachidonate lipoxygenase  
AD Alzheimer's disease  
Fer-1 ferrostatin-1  
Lip-1 lipoxstatin-1  
Cy5 cyanine 5  
RTA radical trapping antioxidants  
BBB blood brain barrier  
POx-poly(oxazoline)s  
PDCs polymer drug conjugates  
PD pharmacodynamics  
MeOx-2-methyl-2-oxazoline  
PhOx 2-phenyl-2-oxazoline  
DPhOx 2-(4-(1,3-dioxolan-2-yl)phenyl)-2-oxazoline  
AldOx aldehyde functional deprotected-2-(4-(1,3-dioxolan-2-yl)phenyl)-2-oxazoline  
BuOx 2-butyl-2-oxazoline  
CCMs core crosslinked micelles  
CMC critical micelle concentration  
SAR structure activity relationship  
C<sub>11</sub>-BODIPY membrane sensor for lipid peroxidation  
BODIPY-(488/530) oxidized membrane sensor for lipid peroxidation

## Polymer library

M45F4R MeOx45Ferrostatin4 reduced  
M45D4 MeOx45Diarylamine4  
M45P5 MeOx45PhOx5  
M20P40 MeOx20PhOx40  
M30P20 MeOx30PhOx20  
M40P10 MeOx40PhOx10  
M30P15Ald5 MeOx30PhOx15AldOx5  
M30P15D4 MeOx30PhOx15Diarylamine5  
M36B23 MeOx36BuOx23  
Et-CCM ethylenediamine crosslinked core crosslinked micelles  
Ph-CCM p-phenylenediamine crosslinked core crosslinked micelles

**Table S1.** Further characterization of DPhOx based copolymers and related nanomaterials.

| Polymer | DP<br>(MeOx) | DP<br>(co-monomer) | Pre-modification                               |                                                | Đ    |
|---------|--------------|--------------------|------------------------------------------------|------------------------------------------------|------|
|         |              |                    | M <sub>n</sub> , NMR<br>(g mol <sup>-1</sup> ) | M <sub>n</sub> , SEC<br>(g mol <sup>-1</sup> ) |      |
| M45F4R  | 45           | 4                  | 5606                                           | 12500                                          | 1.21 |
| M45D4   | 45           | 4                  | 4861                                           | 10600                                          | 1.14 |
| M45P5   | 45           | 5                  | 4598                                           | 9300                                           | 1.14 |

**Table S2.** EC<sub>50</sub> values for bioactive polymers in this study

| Polymer  | EC <sub>50</sub> (mM)   |
|----------|-------------------------|
| M45P5    | 1.32                    |
| M45D4    | 0.13                    |
| M45F4R   | 0.66 x 10 <sup>-3</sup> |
| M40P10   | 0.25                    |
| M30P20   | 0.11                    |
| M30P15D5 | 0.052                   |
| M20P40   | 0.03                    |
| Ph-CCM   | 0.008                   |
| Et-CCM   | 0.024                   |

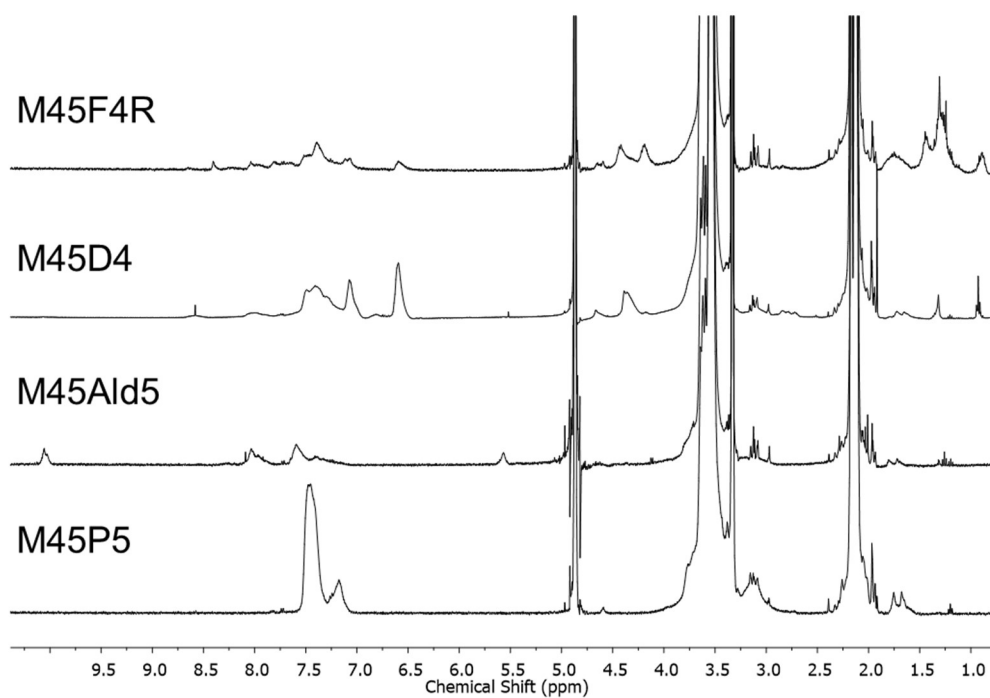

**Figure S1.**  $^1\text{H}$  NMR spectra of the PhOx containing polymers at different stages of synthesis.

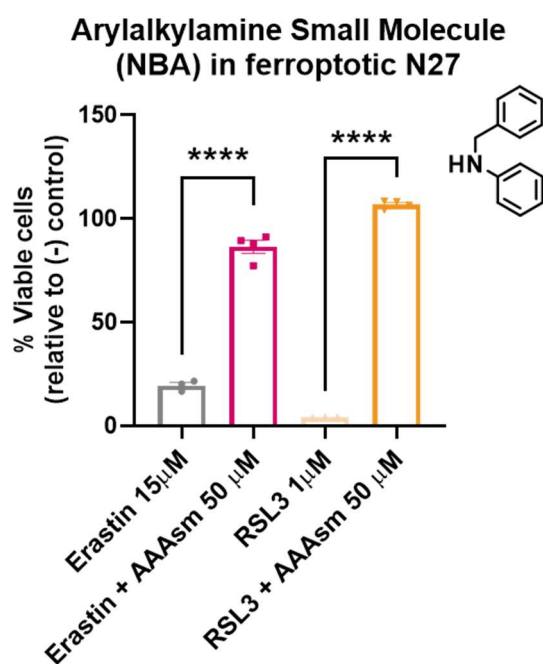

**Figure S2.** N-Benzylaniline (NBA) suppresses ferroptosis at concentration equal to number of polymeric units of arylalkylamine.

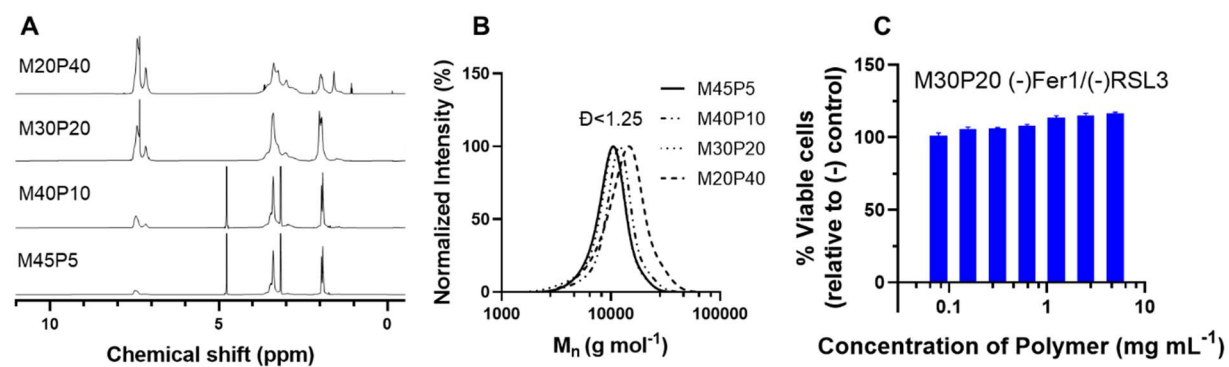

**Figure S3.** Characterization of P(MeOx-grad-PhOx) library. A)  $^1\text{H}$  NMR spectra of copolymers with increasing % benzamide content and B) their resulting SEC chromatograms. C) AlamarBlue cell viability assay in N27 cells of M30P20 after 24 hours with up to  $5.0\text{ mg mL}^{-1}$  polymer.

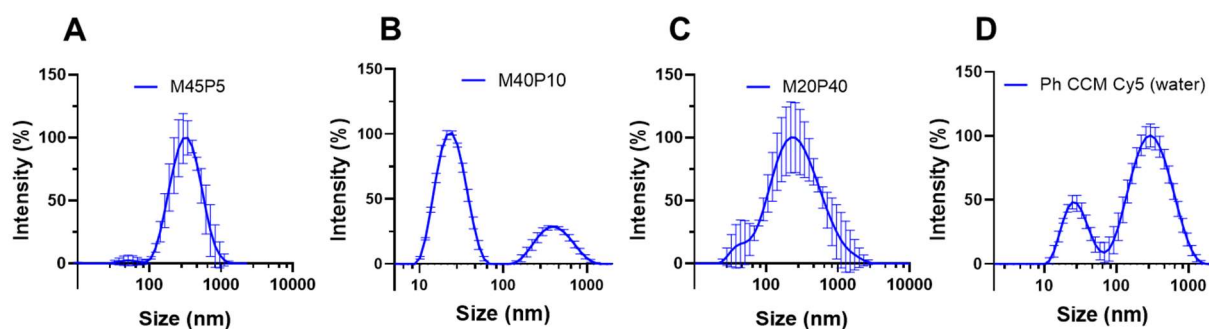

**Figure S4.** DLS study showing normalized % intensity traces of P(MeOx-grad-PhOx) library and Ph-CCM<sub>cy5</sub>.

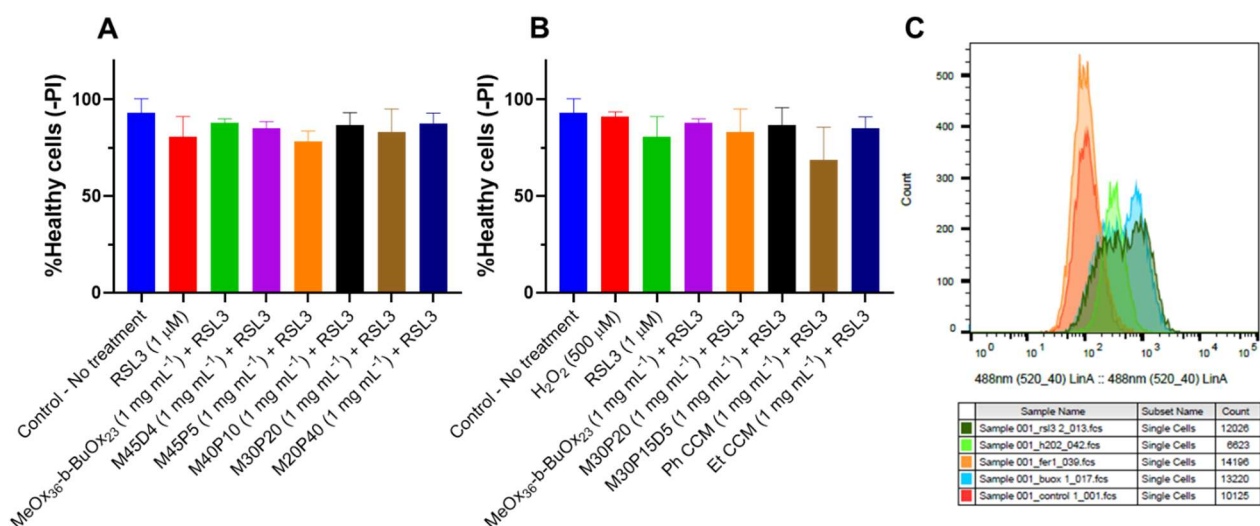

**Figure S5.** % Viable cells determined by PI for treatment conditions used in flow cytometry experiments with C<sub>11</sub>-BODIPY. A) P(MeOx-grad-PhOx) library and M30P15D5. B) CCMs and series. C) Controls for C<sub>11</sub>-BODIPY probe showing average ROS activated BODIPY- (488/530) MFI of cell populations (red-no treatment, light green-H<sub>2</sub>O<sub>2</sub> 500  $\mu$ M, blue-RSL3 1  $\mu$ M, orange-RSL3+Fer-1 1  $\mu$ M, blue-RSL3+M36B23 1 mg mL<sup>-1</sup>).

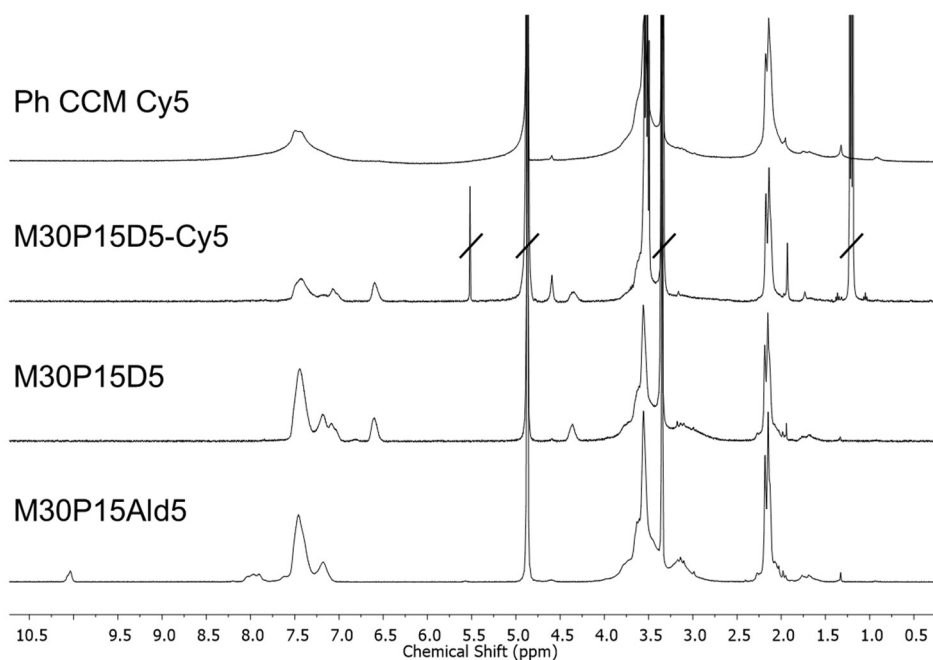

**Figure S6.** <sup>1</sup>H NMR spectra of linear polymer arm containing AldOx (M30P15Ald5), its modification with Cy5 (M30P15D5-Cy5), aniline (M30P15D5) and then Ph-CCM<sub>cy5</sub>.

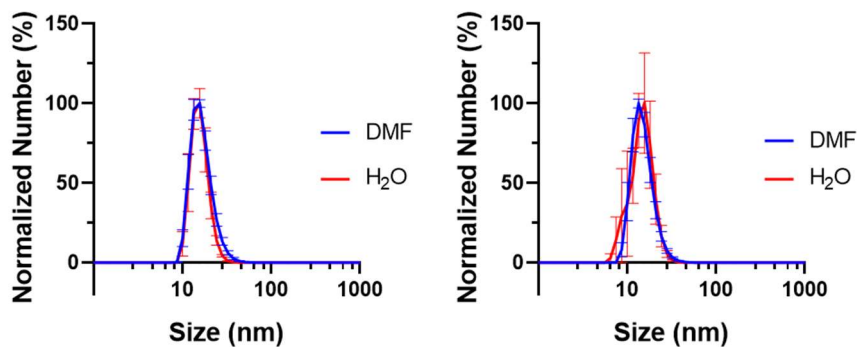

**Figure S7.** DLS of CCMs in different solvents (left: Ph-CCM, right: Et-CCM). M30P20 “arm” was attempted in DMF but did not self-assemble in this solvent. Concentration used for all samples –  $1 \text{ mg mL}^{-1}$ .

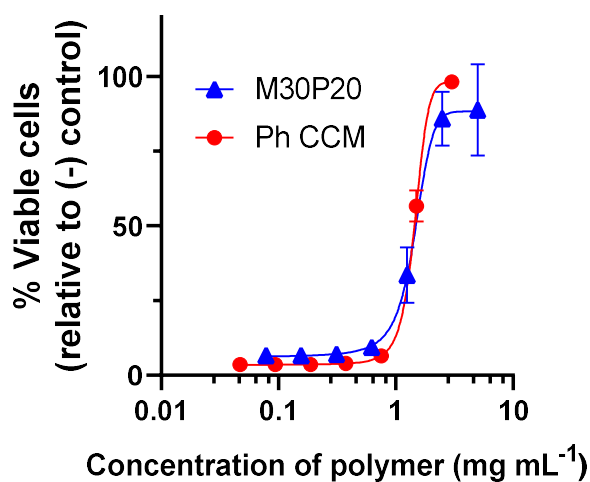

**Figure S8.** Dose-response curves of M30P20 and Ph-CCM plotted against  $\text{mg mL}^{-1}$  highlighting comparison of relatively similar % benzamide content and response to ferroptosis and additionally the lack of effect of CMC on ferroptosis suppression.



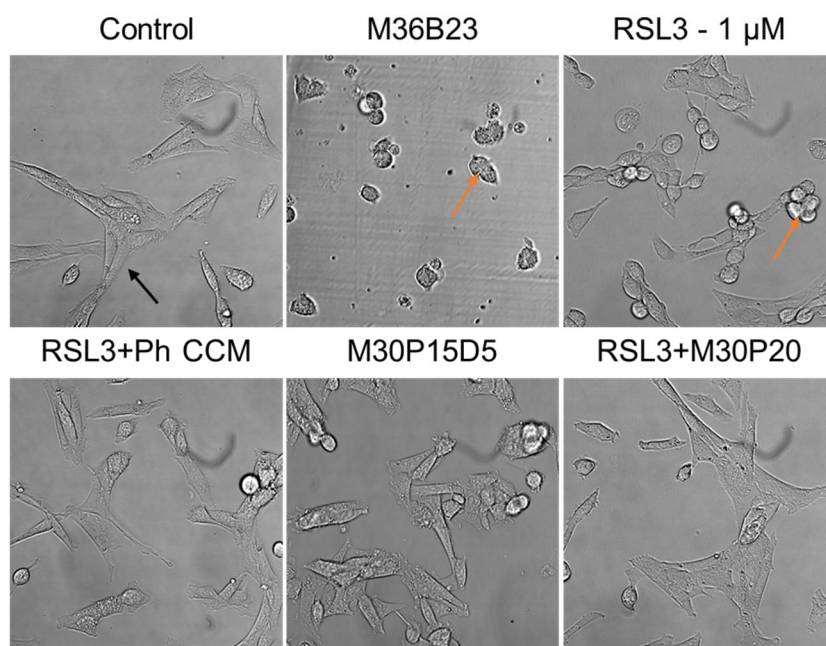

**Figure S9.** Bright field images from  $C_{11}$ -BODIPY confocal experiment highlighting cell appearance (black arrows: healthy cells with neurite outgrowth, orange: unhealthy constricted cells). RSL3 – 1  $\mu$ M, polymer – 1  $\text{mg mL}^{-1}$ .

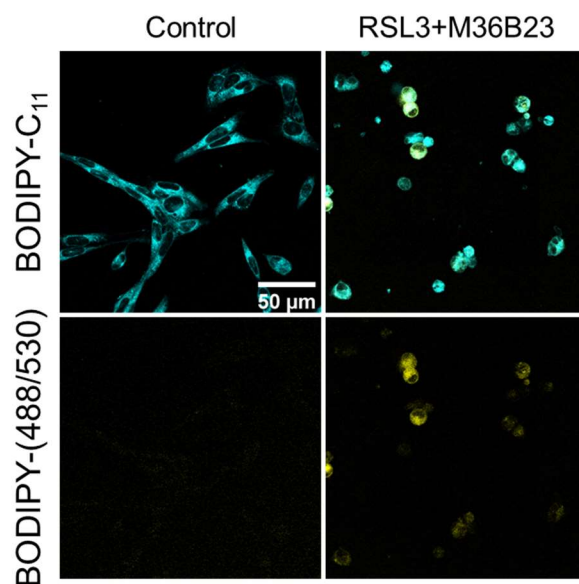

**Figure S10.** Fluorescent images from  $C_{11}$ -BODIPY experiment showing the M36B23 control producing ROS-activated BODIPY-(488/530) from membrane lipid peroxidation. RSL3 – 1  $\mu$ M, polymer – 1  $\text{mg mL}^{-1}$ .

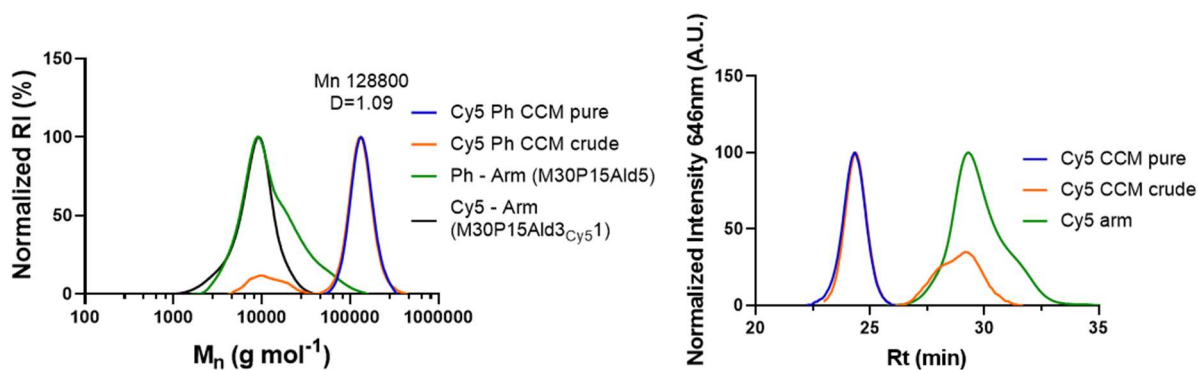

**Figure S11.** Ph-CCM<sub>Cy5</sub> characterization by SEC chromatography (Normalized UV absorbance at 646 nm).

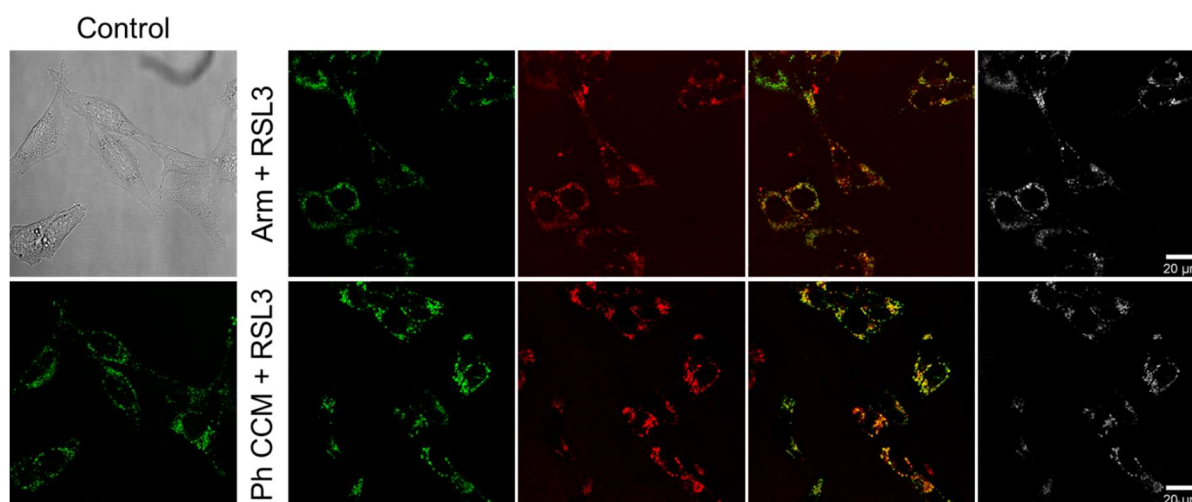

**Figure S12.** Lysosomal colocalization experiment in RSL3 treated cells (RSL3 at 1  $\mu M$  for 4 hours as cotreatment). Arm-M30P15D<sub>5<sub>Cy5</sub></sub>, CCM-Ph-CCM<sub>Cy5</sub>. Green channel-lysotrackerGreen, red channel- polymer Cy5, grey channel-colocalization using “AND” function in FIJI image calculator. Scale bar 20  $\mu m$ .

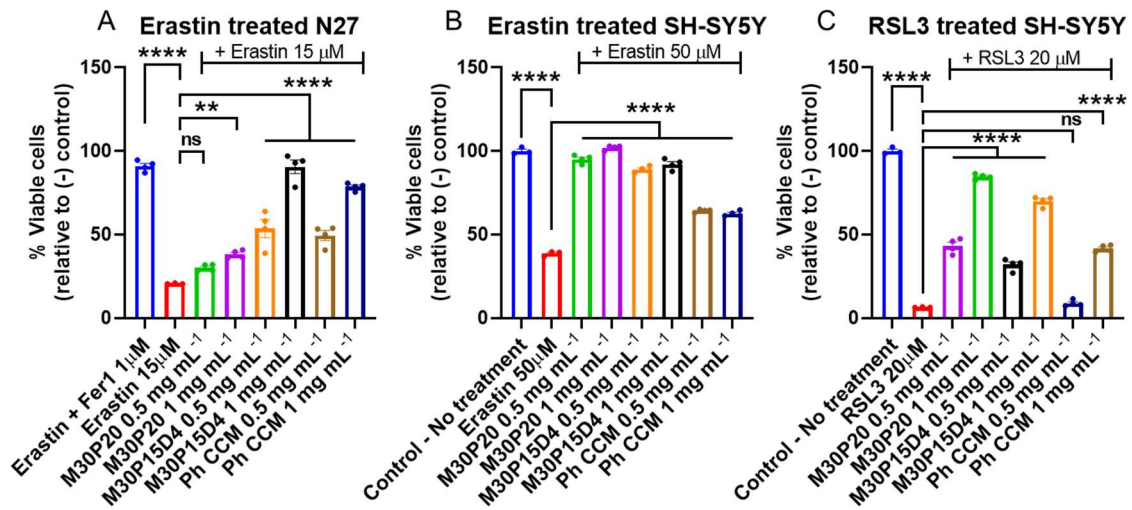

**Figure S13.** Bioactive polymers attenuate alternate models of ferroptosis in N27 and SH-SY5Y.
